# Supplementary material for: The proteasome factor Bag101 binds to Rad22 and suppresses homologous recombination
Source: PubMed Central journal article supplement — Sci Rep. 2013 Jun 19;3:2022. doi: 10.1038/srep02022 (PMC3685826; doi:10.1038/srep02022), 2013-06-19
Supplement: srep02022-s1.pdf [file srep02022-s1.pdf]

## **SUPPLEMENTARY MATERIALS**

\*Correspondence should be addressed to K.K.

E-mail: [komatsu@house.rbc.kyoto-u.ac.jp](mailto:komatsu@house.rbc.kyoto-u.ac.jp)

### **The proteasome factor Bag101 binds to Rad22 and suppresses homologous recombination**

Yuichiro Saito<sup>1</sup>, Jun Takeda<sup>2</sup>, Masahiro Okada<sup>3</sup>, Junya Kobayashi<sup>1</sup>, Akihiro Kato<sup>1</sup>, Kouji Hirota<sup>2</sup>, Masato Taoka<sup>2</sup>, Tomohiro Matsumoto<sup>4</sup>, Kenshi Komatsu<sup>1\*</sup> and Toshiaki Isobe<sup>2</sup>

<sup>1</sup> Division of Genome Repair Dynamics, Radiation Biology Center, Kyoto University, Yoshida-konoecho, Sakyo-ku, Kyoto 606-8501, Japan.

<sup>2</sup> Department of Chemistry, Tokyo Metropolitan University, Minami-Osawa, Hachioji-shi, Tokyo 192-0397, Japan.

<sup>3</sup> Center for Priority Areas, Tokyo Metropolitan University, Minami-Osawa, Hachioji-shi, Tokyo 192-0397, Japan.

<sup>4</sup> Division of System biology, Radiation Biology Center, Kyoto University, Yoshida-konoecho, Sakyo-ku, Kyoto 606-8501, Japan.

**Supplementary Table S1: Fission yeast strains used in this study**

| <b>Strain</b> | <b>Genotype</b>                                                                     | <b>Source</b> |
|---------------|-------------------------------------------------------------------------------------|---------------|
| JJ098         | <i>h<sup>+</sup> leu1-32 ura4-D18 spac25b8.16::spac25b8.16-SV40pA-kanMX6</i>        | This study    |
| JJ0910        | <i>h<sup>+</sup> leu1-32 ura4-D18 rad22::rad22-FLATA-kanMX6</i>                     | This study    |
| JJ1035        | <i>h<sup>-</sup> leu1-32 Dura4::RDUX200(+)</i> pFOX1-abp2-FH6                       | This study    |
| JJ1036        | <i>h<sup>-</sup> leu1-32 Dura4::RDUX200(+)</i> pFOX1-bag101-FH6                     | This study    |
| JJ1037        | <i>h<sup>-</sup> leu1-32 Dura4::RDUX200(+)</i> pFOX1-sap1-FH6                       | This study    |
| JJ1038        | <i>h<sup>-</sup> leu1-32 Dura4::RDUX200(+)</i> pFOX1-ssa1-FH6                       | This study    |
| JJ1039        | <i>h<sup>-</sup> leu1-32 Dura4::RDUX200(+)</i> pFOX1-ssb1-FH6                       | This study    |
| JJ1040        | <i>h<sup>-</sup> leu1-32 Dura4::RDUX200(+)</i> pFOX1-ssb2-FH6                       | This study    |
| JJ1041        | <i>h<sup>-</sup> leu1-32 Dura4::RDUX200(+)</i> pFOX1-rad22-FH6                      | This study    |
| JJ1042        | <i>h<sup>-</sup> leu1-32 Dura4::RDUX200(+)</i> pFOX1-rim1-FH6                       | This study    |
| JJ1043        | <i>h<sup>-</sup> leu1-32 Dura4::RDUX200(+)</i> pFOX1-rti1-FH6                       | This study    |
| JJ1044        | <i>h<sup>-</sup> leu1-32 Dura4::RDUX200(+)</i> pFOX1-rvb2-FH6                       | This study    |
| JJ1045        | <i>h<sup>-</sup> leu1-32 Dura4::RDUX200(+)</i> pFOX1-FH6                            | This study    |
| JJ1046        | <i>h<sup>-</sup> leu1-32 Dura4::RDUX200(+)</i> rad22-Venus pFOX1-abp2-FH6           | This study    |
| JJ1047        | <i>h<sup>-</sup> leu1-32 Dura4::RDUX200(+)</i> rad22-Venus pFOX1-bag101-FH6         | This study    |
| JJ1048        | <i>h<sup>-</sup> leu1-32 Dura4::RDUX200(+)</i> rad22-Venus pFOX1-sap1-FH6           | This study    |
| JJ1049        | <i>h<sup>-</sup> leu1-32 Dura4::RDUX200(+)</i> rad22-Venus pFOX1-ssa1-FH6           | This study    |
| JJ1050        | <i>h<sup>-</sup> leu1-32 Dura4::RDUX200(+)</i> rad22-Venus pFOX1-ssb1-FH6           | This study    |
| JJ1051        | <i>h<sup>-</sup> leu1-32 Dura4::RDUX200(+)</i> rad22-Venus pFOX1-ssb2-FH6           | This study    |
| JJ1052        | <i>h<sup>-</sup> leu1-32 Dura4::RDUX200(+)</i> rad22-Venus pFOX1-rad22-FH6          | This study    |
| JJ1053        | <i>h<sup>-</sup> leu1-32 Dura4::RDUX200(+)</i> rad22-Venus pFOX1-rim1-FH6           | This study    |
| JJ1054        | <i>h<sup>-</sup> leu1-32 Dura4::RDUX200(+)</i> rad22-Venus pFOX1-rti1-FH6           | This study    |
| JJ1055        | <i>h<sup>-</sup> leu1-32 Dura4::RDUX200(+)</i> rad22-Venus pFOX1-rvb2-FH6           | This study    |
| JJ1056        | <i>h<sup>-</sup> leu1-32 Dura4::RDUX200(+)</i> rad22-Venus pFOX1-FH6                | This study    |
| JJ1103        | <i>h<sup>-</sup> leu1-32 Dura4::RDUX200(+)</i> rad22-Venus<br>pFOX1-bag101(BAG)-FH6 | This study    |
| JJ1104        | <i>h<sup>-</sup> leu1-32 Dura4::RDUX200(+)</i> rad22-Venus                          | This study    |

pFOX1-bag101(UBL)-FH6

|         |                      |                                                                    |                 |
|---------|----------------------|--------------------------------------------------------------------|-----------------|
| JJ1110  | <i>h<sup>-</sup></i> | <i>leu1-32 Dura4::RDUX200(+)</i> pFOX1-bag101(BAG)-FH6             | This study      |
| JJ1111  | <i>h<sup>-</sup></i> | <i>leu1-32 Dura4::RDUX200(+)</i> pFOX1-bag101(UBL)-FH6             | This study      |
| JJ1119  | <i>h<sup>-</sup></i> | <i>leu1-32 Dura4::RDUX200(+)</i> <i>bag101D::natMX6</i>            | This study      |
| JJ1121  | <i>h<sup>-</sup></i> | <i>leu1-32 Dura4::RDUX200(+)</i> <i>bag101::bag101-HATA-natMX6</i> | This study      |
| JJ1125  | <i>h<sup>-</sup></i> | <i>leu1-32 Dura4::RDUX200(+)</i> <i>rad22-Venus</i> pFOX1-msh2-FH6 | This study      |
| JJ1126  | <i>h<sup>-</sup></i> | <i>leu1-32 Dura4::RDUX200(+)</i> <i>rad22-Venus</i> pFOX1-msh6-FH6 | This study      |
| JJ1127  | <i>h<sup>-</sup></i> | <i>leu1-32 Dura4::RDUX200(+)</i> pFOX1-msh2-FH6                    | This study      |
| JJ1128  | <i>h<sup>-</sup></i> | <i>leu1-32 Dura4::RDUX200(+)</i> pFOX1-msh6-FH6                    | This study      |
| JJ1129  | <i>h<sup>-</sup></i> | <i>leu1-32 rad22-Venus bag101D::natMX6</i>                         | This study      |
| JJ1142  | <i>h<sup>-</sup></i> | <i>leu1-32</i>                                                     | This study      |
| JJ1143  | <i>h<sup>-</sup></i> | <i>leu1-32 bag101D::natMX6</i>                                     | This study      |
| JJ1144  | <i>h<sup>-</sup></i> | <i>leu1-32</i> pFOX1-bag101-FH6                                    | This study      |
| mts2    | <i>h<sup>-</sup></i> | <i>leu1-32 mts2-1</i>                                              | Prof. Matsumoto |
| mts2+wt | <i>h<sup>-</sup></i> | <i>leu1-32 mts2-1 mts2<sup>+</sup>-8myc-LEU2</i>                   | Prof. Matsumoto |
| mts3    | <i>h<sup>-</sup></i> | <i>leu1-32 mts3-1</i>                                              | Prof. Matsumoto |
| mts3+wt | <i>h<sup>-</sup></i> | <i>leu1-32 mts3-1 mts3<sup>+</sup>-8myc-LEU2</i>                   | Prof. Matsumoto |

---

**Supplementary Table S2: Plasmids used in this study**

| <b>Name</b>                    | <b>Source</b> |
|--------------------------------|---------------|
| pCtFLATAki-rad22-kanMX6-Trad22 | This study    |
| pFOX1-CFH6                     | This study    |
| pFOX1-abp2-FH6                 | This study    |
| pFOX1-bag101-FH6               | This study    |
| pFOX1-sap1-FH6                 | This study    |
| pFOX1-ssa1-FH6                 | This study    |
| pFOX1-ssb1-FH6                 | This study    |
| pFOX1-ssb2-FH6                 | This study    |
| pFOX1-rad22-FH6                | This study    |
| pFOX1-rim1-FH6                 | This study    |
| pFOX1-rti1-FH6                 | This study    |
| pFOX1-rvb2-FH6                 | This study    |
| pFOX1-msh2-FH6                 | This study    |
| pFOX1-msh6-FH6                 | This study    |
| pFOX1-bag101(BAG)-FH6          | This study    |
| pFOX1-bag101(UBL)-FH6          | This study    |
| pCtHATAki-Pbag1-natMX6-Tbag1   | This study    |
| pCtHATAki-bag101-kanMX6-Trad22 | This study    |

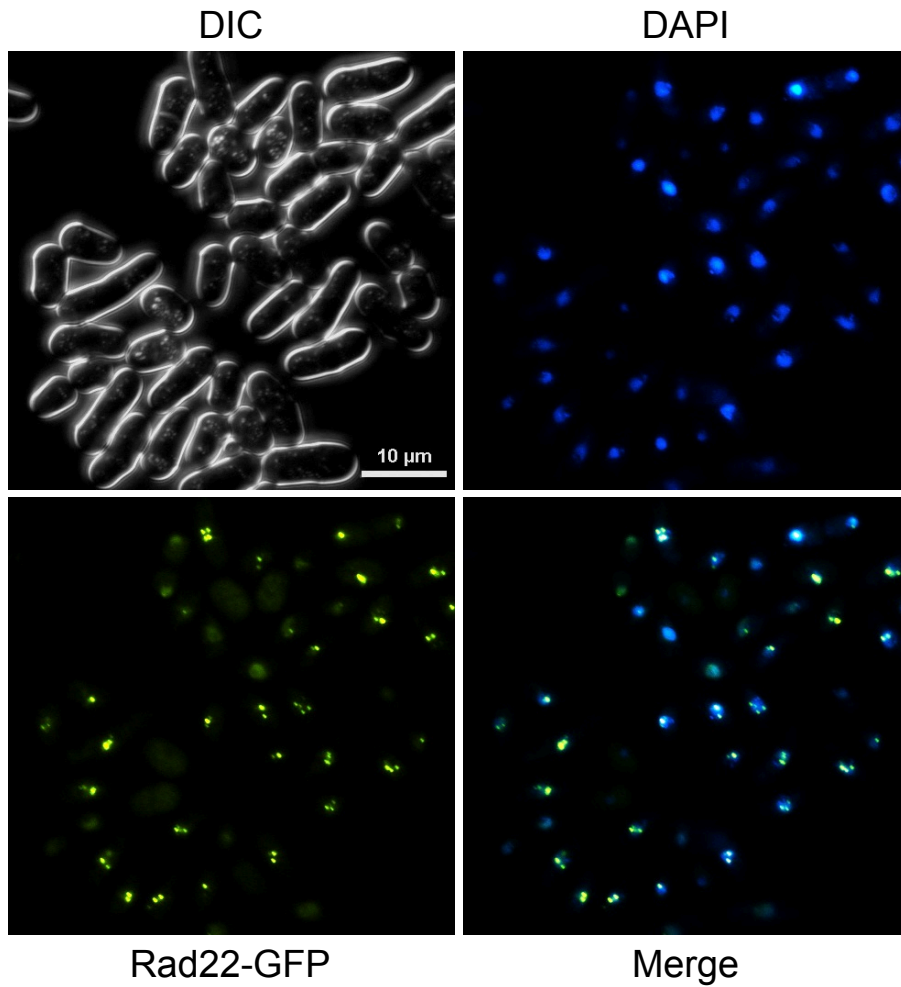

**Supplementary Figure S1: Rad22-foci formation.** Rad22 foci formation was observed with a Nikon Eclipse 90i fluorescent microscope. The cells containing at least one of Rad22-foci were counted for Rad22-foci positive cells.

**Supplementary Table S3: Primers used for cloning, construction of Bag101 domain-deleted mutants and quantitative PCR**

| <b>Name</b>     | <b>Sequence (5'-3')</b>                                |
|-----------------|--------------------------------------------------------|
| Sal-abp2-F      | GGGGGTCGACTATG- <u>AACTTTTATTCCTTGTTGCCATCTAGACATG</u> |
| Nde-abp2-R      | GGGGGGGGCATATG- <u>GTCAAACACTGCATTCATAATCTTTCTC</u>    |
| Sal-bag101-F    | GGGGGTCGACTATG- <u>TCAGAAAAGACTAGCACAGTTACAATACAC</u>  |
| Nde-bag101-R    | GGGGGGGGCATATG- <u>TGCGGCCACTTCTTGGCTTGTTG</u>         |
| Sma-sap1-F      | GGGCCCGGGTTATG- <u>GAAGCTCCCAAGATGGAAGTG</u>           |
| Nde-sap1-R      | GGGGGGGGCATATG- <u>ATGGTCACCAAGATTAGGAGAGATG</u>       |
| Sal-ssa1-F      | GGGGGTCGACT- <u>ATGAGCAAGTCTATCGGTATTGATTTG</u>        |
| Nde-ssa1-R      | GGGGGGGGCATATG- <u>ATCCACTTCTTCAACCTCAGGTC</u>         |
| Sal-ssb1-F      | GGGGGTCGACT- <u>ATGGCTGAGCGATTATCCGTGGG</u>            |
| Nde-ssb1-R      | GGGGGGGGCATATG- <u>TTGAGCAGACTCAATGAAATTTATC</u>       |
| Sal-ssb2-F      | GGGGGTCGACT- <u>ATGGCTTATGATGCTTTTGGCAAGC</u>          |
| Nde-ssb2-R      | GGGGGGGGCATATG- <u>TTGGTCTTGTA AAAACACTTTTAAATGATT</u> |
| Sal-rad22-F     | GGGGGTCGACT- <u>ATGTCTTTTGAGCAAAAACAGC</u>             |
| Nde-rad22-R     | GGGGGGGGCATATG- <u>TCCTTTTTTGGCTTTCTTATCCAC</u>        |
| Sal-rim1-F      | GGGGGTCGACTATG- <u>CTATTCTTAAAATCCAGCAGAGCATTTTTC</u>  |
| Nde-rim1-R      | GGGGGGGGCATATG- <u>GAAGCTGTTAATCATAGGATCTGCG</u>       |
| Sal-rti1-F      | GGGGGTCGACT- <u>ATGGGCTCGCTACCTGATCAATC</u>            |
| Nde-rti1-R      | GGGGGGGGCATATG- <u>TTTCGTTGAGAACGTGTTTGCAGAG</u>       |
| Sal-rvb2-F      | GGGGGTCGACTATG- <u>TCGATTTTCGGTGACTTCTCATAATGATG</u>   |
| Nde-rvb2-R      | GGGGGGGGCATATG- <u>ATCTTCCTGCATTGCAACTGCATTATC</u>     |
| Sma-msh2-F      | GGGCCCGGGTTATG- <u>TCTTCTAGAAACGCTTCAATTGCTAATG</u>    |
| Sfo-msh2-R      | GGGGGGGGGGCGCC- <u>TGAGGAAACCTCATTGTGGATAC</u>         |
| Sma-msh6-F      | GGGCCCGGGTTATG- <u>AGCGTTGGGAACGTTGGCAAG</u>           |
| Sfo-msh6-R      | GGGGGGGGGGCGCC- <u>TTCAAACGAATCAAGTATGAGAGGTATATTC</u> |
| i_bag101(BAG)-R | <u>ATTCTCCGCTTCCGCTTTCGGAG</u>                         |
| i_bag101(UBL)-F | <u>CCTGTATTTTCGCGTATTTCTGG</u>                         |
| BsiWI-Pbag1-F   | GGGGGGCGTACG- <u>ATATGATCCTTACCCAATTCCGTG</u>          |

|                |                                                 |
|----------------|-------------------------------------------------|
| Acc65I-Pbag1-R | <u>GGGGGGGTACC-TGACGATATTAAGTCGACTTGCTTAAC</u>  |
| Spe-Tbag1-F    | <u>GGGGGACTAGT-TAGGCTTTATTATTTTATAGACGTTACC</u> |
| Nhe-Tbag1-R    | <u>GGGGGCTAGC-GGACGTGCAATAACTGTAGAGCG</u>       |
| Sac-bag101-R   | <u>GGGGGAGCTC-TGCGGCCACTTCTTGGCTTGTTTG</u>      |
| rt_hxk2_730+   | <u>GGTGATCATATGCTTATCAACATGG</u>                |
| rt_hxk2_846-   | <u>AAAGATTTGACGACCAGCATTGG</u>                  |
| rt_rad22_1059+ | <u>TCCCTTCACGAACAACCTTTAATCC</u>                |
| rt_rad22_1177- | <u>GCTTAATTATAGGTAAAACCGATGCC</u>               |

---

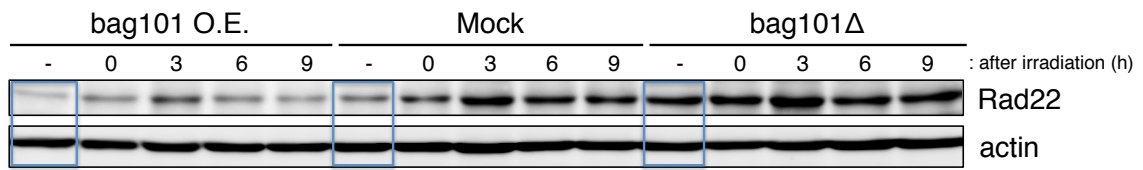

**Supplementary Figure S2: levels of Rad22 protein expressed in bag101 mutants.**

The amounts of Rad22 in cells overexpressing bag101 or deleting bag101 were determined by Western blotting with anti-Rad22 antibodies at the indicated time after irradiation. The Rad22 protein levels in no-irradiated cells (indicated by blue rectangles) were represented in Figure 3a.
